# Supplementary material for: Stoichiometry modulates the optoelectronic functionality of zinc phosphide (Zn3−xP2+x)
Source: Royal Society of Chemistry journal article supplement (doi:10.1039/d2fd00055e), 2022-01-01
Supplement: d2fd00055e1.pdf [file d2fd00055e1.pdf]

**Supporting Information for:**

**Stoichiometry modulates the optoelectronic functionality of Zinc Phosphide ( $\text{Zn}_{3-x}\text{P}_{2+x}$ )**

Elias Z. Stutz,<sup>1</sup> Santhanu P. Ramanandan,<sup>1</sup> Mischa Flor,<sup>1</sup> Rajrupa Paul,<sup>1</sup> Mahdi Zamani,<sup>1</sup> Simon Escobar Steinvall,<sup>1</sup> Diego Armando Sandoval Salaiza,<sup>1</sup> Claudia Xifra,<sup>2</sup> Maria Chiara Spadaro,<sup>2</sup> Jean-Baptiste Leran,<sup>1</sup> Alexander P. Litvinchuk,<sup>3</sup> Jordi Arbiol,<sup>2,4</sup> Anna Fontcuberta i Morral,<sup>1,5</sup> Mirjana Dimitrievska<sup>1\*</sup>

*1 - Laboratory of Semiconductor Materials, Institute of Materials, Faculty of Engineering, Ecole Polytechnique Fédérale de Lausanne, 1015 Lausanne, Switzerland.*

*2 – Catalan Institute of Nanoscience and Nanotechnology (ICN2), CSIC and BIST, Campus UAB, Bellaterra, Barcelona, Catalonia, Spain*

*3 - Texas Center for Superconductivity and Department of Physics, University of Houston, Houston, Texas 77204-5002, United States of America*

*4 - ICREA, Pg. Lluís Companys 23, Barcelona, Catalonia, Spain.*

*5 - Institute of Physics, Faculty of Basic Sciences, Ecole Polytechnique Fédérale de Lausanne, 1015 Lausanne, Switzerland.*

\* e-mail: [mirjana.dimitrievska@epfl.ch](mailto:mirjana.dimitrievska@epfl.ch)

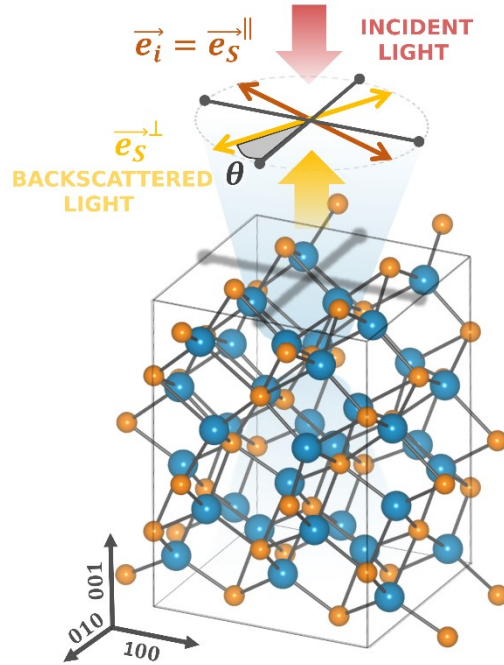

**Figure S1. Schematic representation of the Raman scattering polarization measurements.** Raman measurements are performed on the (001) basal plane with incident laser light (wide red arrow) projected along the  $-z$ -axis ( $[001]$  direction). The incident light polarization and the output polarization in perpendicular configuration are represented by the thin red and yellow arrows, respectively. The black arrows indicate the  $x$  and  $y$  axis of the crystal corresponding to  $[100]$  and  $[010]$  directions, respectively. The polarization angle  $\theta = \pi/4$  was used for all three monocrystalline zinc phosphide thin films.

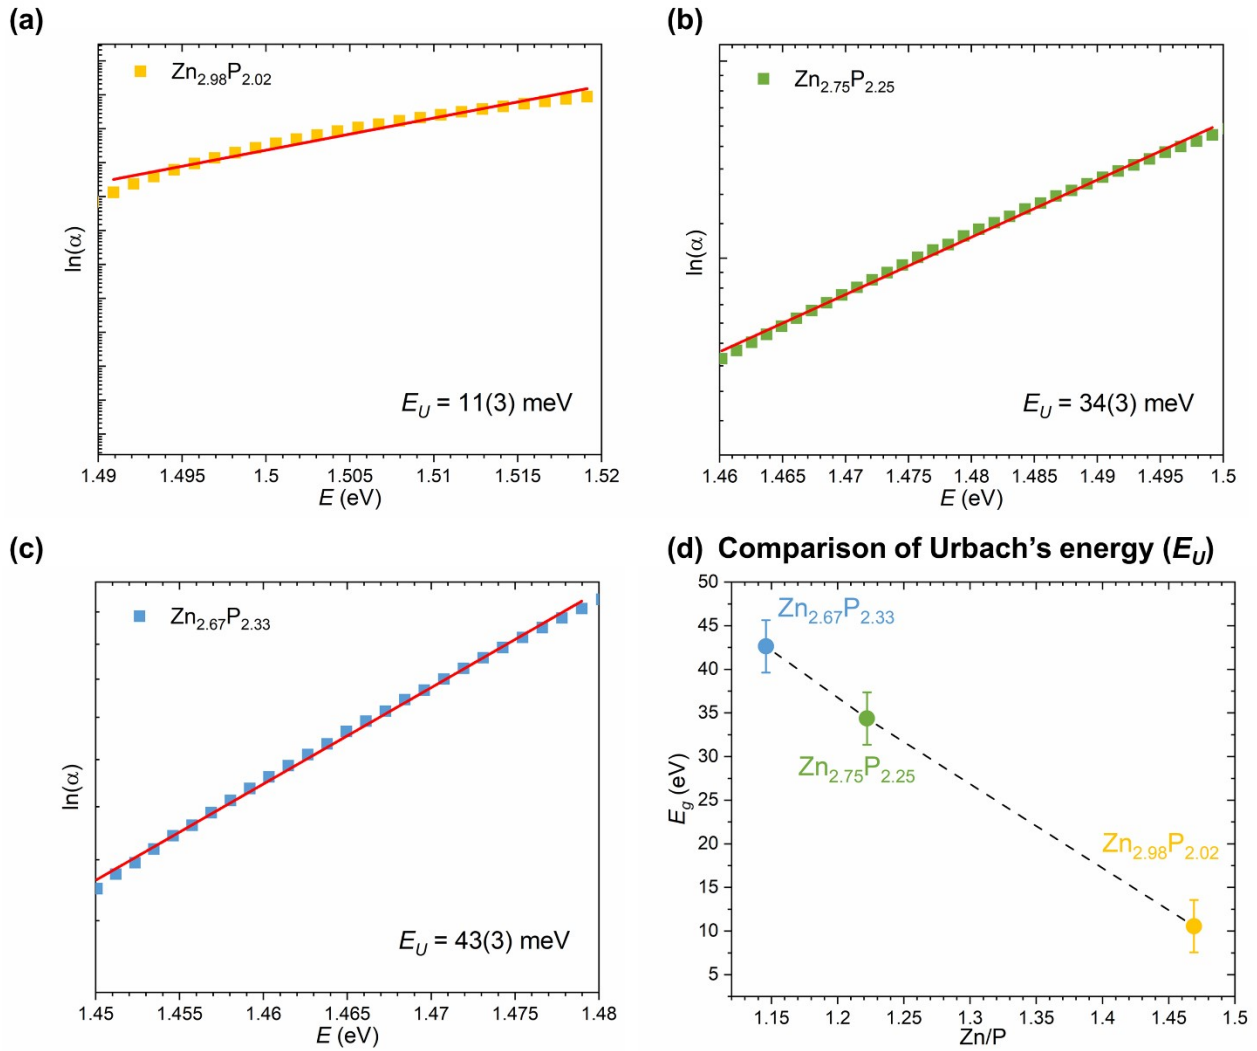

**Figure S2.** Urbach energy calculation from absorption measurements for samples with various compositions: (a)  $\text{Zn}_{2.98}\text{P}_{2.02}$  ( $\text{Zn/P} = 1.47$ ), (b)  $\text{Zn}_{2.75}\text{P}_{2.25}$  ( $\text{Zn/P} = 1.22$ ) and (c)  $\text{Zn}_{2.67}\text{P}_{2.33}$  ( $\text{Zn/P} = 1.15$ ). (d) Comparison of Urbach energy with composition.
